# Supplementary material for: Simulation of solid-state phase transition indl-methionine
Source: Royal Society of Chemistry journal article supplement (doi:10.1039/d3ce00227f), 2023-01-01
Supplement: d3ce00227f1.pdf [file d3ce00227f1.pdf]

# 1 **Supporting Information for**

## 2 **Simulation of solid-state phase transition in DL-methionine**

3 **Saba Ghasemlou, Bernd Ensing and Herma M. Cuppen**

4 **Herma M. Cuppen.**

5 **E-mail: [h.cuppen@science.ru.nl](mailto:h.cuppen@science.ru.nl)**

### 6 **This PDF file includes:**

7 Supporting text(Construction of collective variables)

8 Figs. S1 to S2

9 SI References

## 10 Supporting Information Text

### 11 1. Construction of collective variables

12 This Supporting Information describes the technical details of the construction of the collective variables. In constructing the  
13 torsional CVs,  $t_\alpha$  and  $t_\beta$ , the torsional angles' periodicity has been considered. For the  $\alpha$  configuration, the dihedral angles  
14 range from  $50^\circ$  to  $100^\circ$  for the L-enantiomer and from  $-100^\circ$  to  $-50^\circ$  for the D-enantiomer. In the  $\beta$  configuration, these ranges  
15 are from  $150^\circ$  to  $200^\circ$  and from  $-200^\circ$  to  $-150^\circ$ , respectively. The fractions of D- and L- enantiomers that fall in either of the  
16 two ranges ( $t_{\alpha-D}$  and  $t_{\beta-D}$  for D and  $t_{\alpha-L}$ ,  $t_{\beta-L}$  for L) is determined using the `TORSIONS` keyword in `plumed` (1–5) and are  
17 subsequently combined to obtain  $t_\alpha$  and  $t_\beta$  via

$$18 \quad t_\alpha = 0.5t_{\alpha-D} + 0.5t_{\alpha-L} \quad [1]$$

19 and

$$20 \quad t_\beta = 0.5t_{\beta-D} + 0.5t_{\beta-L}. \quad [2]$$

21 For the  $\alpha \rightarrow \beta$  transition, the  $t_\alpha$  varies from 0.52 to 0.09 while  $t_\beta$  varies from 0.09 to 0.52.

22 The CVs  $d_b^i$  and  $d_c^i$  measure the relative positioning of the bilayers during the phase transition with the minimum shifting  
23 along the “b” and “c” vectors. The  $d_b^i$  and  $d_c^i$  use the projected distances between sulfur atoms of opposing bilayers on the  
24 lattice vectors  $b$  and  $c$ , respectively. To write this in a mathematical notation, we label the different sulfur atoms of the  
25 D-molecules to indicate their order in the simulation cell along the three axes:  $S_{i,j,k}$ . This label remains throughout the  
26 simulation, regardless of their movement through the periodic boundary. Either the D or L-molecules should be included and  
27 thus labeled in Fig. S1. This is because including both enantiomers, causes the  $\alpha$  and  $\beta$  states to appear at the same values of  
28  $d_b^i$  and  $d_b$ . In Fig. S1 sulfur atoms  $S_{i,j,k}$ , and  $S_{i+1,j,k}$  are in bilayers facing each other. An extra superscript label indicates that  
29 the position of the sulfur atoms is expressed in fractional coordinates with respect to the three lattice vectors of the simulation  
30 cell and only the component indicated by the label is considered. A variable  $d_b^i$  determines the shift between layers  $i$  and  $i + 1$ :

$$31 \quad d_b^i = \frac{1}{n_c} \sum_{k=1}^{n_c} \sum_{j=1}^{n_b/2} (S_{i,j,k}^b - S_{i+1,j,k}^b) \quad [3]$$

32 with  $n_i$  the number of D-molecules in the direction  $i$ . Periodic boundary conditions are considered such that  $j'$  becomes  
33  $|n_b - j'|$  for any  $j' > n_b$ . The equilibrium value for the  $\alpha$  form is around 0.5. Because of the periodic nature of the system, the  
34 transition towards  $\beta$  can either occur by increasing or decreasing this value. To account for this, we combine the values for the  
35 different layers in the following fashion:

$$36 \quad d_b = \sum_{i=1}^{n_a/2} |d_b^i + 0.5|. \quad [4]$$

37 Using  $d_b$  we account for the shifts along  $b$  and between all adjacent bilayers. Its equilibrium value is near 0 for  $\alpha$  and near 1 or  
38 -1 for  $\beta$ . A similar collective variable is constructed for shifts along  $c$ . Here the equilibrium value for  $d_c^i$  is 0 in  $\alpha$  and -0.5 or 0.5  
39 in  $\beta$ .

40 Since a full six-dimensional space is too large to explore, we have further combined these six CVs into two CVs. One that  
41 mostly concerns the changes in the  $(a, b)$  projection:  $d_b$  which is a combination of  $d_b^1$  and  $d_b^2$ . During the initialization of the  
42 system, we force two bilayers to change simultaneously, since this leads to the least distorted final cells with the lowest final  
43 (free) energies and the two CVs can easily be combined into one average shift. The changes in the  $(a, c)$ -plane mostly concern  
44 shifts  $d_c^1$  and  $d_c^2$  and torsions  $t_\alpha$  and  $t_\beta$ . The latter two are highly correlated. Initial exploratory simulations in which the  
45 system was pushed along on CV in the direction of its  $\beta$ -value showed that (i) both bilayers need to shift simultaneously for  
46 the system not to get very slanted and distorted unit cells and (ii) the changes in  $d_c$  and torsions are highly correlated and  
47 that changes in one CV lead to changes in the other as well. We hence combine all four CVs in a path collective variable  
48 (PCV)(2, 4). This PCV has two properties:  $s$  which is the progress along the path from the fully-ordered  $\alpha$  form ( $s = 0$ ) to the  
49  $\beta$  form ( $s = 1$ ). The property  $z$  is the deviation of the system from the path. The property  $s$  is the only CV that describes the  
50 changes in  $(a, c)$  projection. The  $z$  is not a CV but we explain in Section 3.3 of the main paper how restraining it is essential to  
51 obtain the free energy surface for a not disrupted simulation cell.

### 52 2. Schematic comparison between DL-Methionine and DL-aminoheptanoic acid in CV space

53 DL-aminoheptanoic acid polymorphs (forms I to IV) are compared to the  $\alpha$ -DL-MET and  $\beta$ -DL-MET in CV space. The  
54 packing and conformation of forms I and III are similar to the  $\alpha$  and  $\beta$  states respectively. Form V is not present in this figure  
55 since it is highly disordered and can not be directly compared to DL-MET.

### $\alpha$ -DL-MET

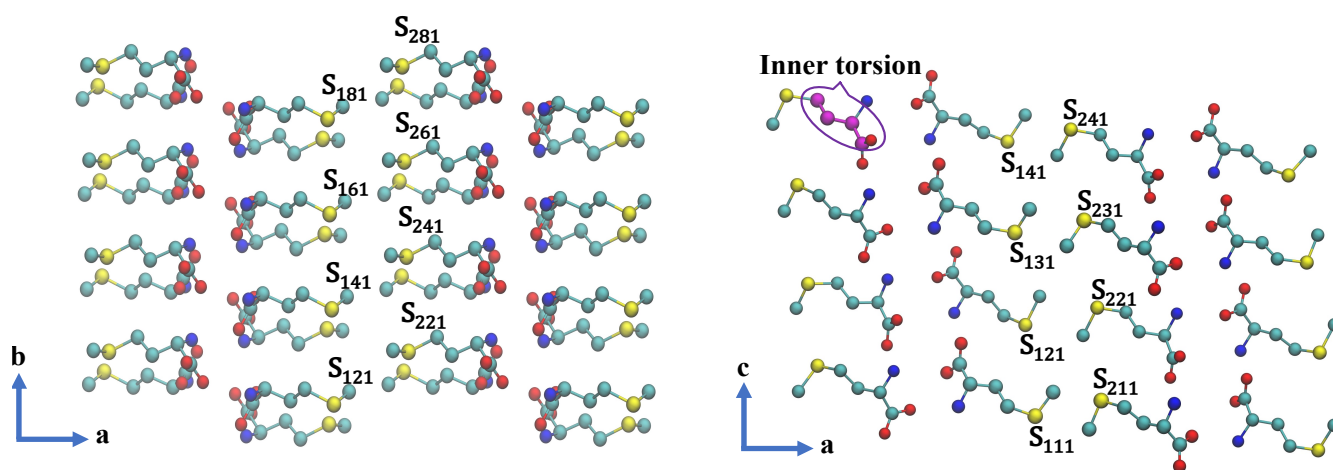

**Fig. S1.** The  $\alpha$  polymorph with labeled sulfur atoms ( $S_{i,j,k}$ ) generates the CV representing the shifts. All torsions like the one indicated in purple are restrained to avoid highly slanted structures.

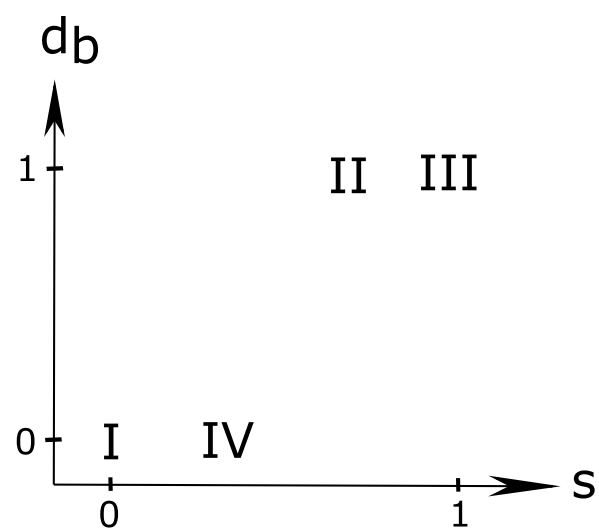

**Fig. S2.** The location of the DL-aminoheptanoic acid polymorphs in CV space in comparison with DL-MET  $\alpha$  and  $\beta$  polymorphs.

56 **References**

- 57 1. Massimiliano Bonomi, Davide Branduardi, Giovanni Bussi, Carlo Camilloni, Davide Provasi, Paolo Raiteri, Davide Donadio,  
58 Fabrizio Marinelli, Fabio Pietrucci, Ricardo A Broglia, et al. Plumed: A portable plugin for free-energy calculations with  
59 molecular dynamics. *Computer Physics Communications*, 180(10):1961–1972, 2009.
- 60 2. Grisell Díaz Leines and Bernd Ensing. Path finding on high-dimensional free energy landscapes. *Physical review letters*, 109  
61 (2):020601, 2012.
- 62 3. Gareth A Tribello, Massimiliano Bonomi, Davide Branduardi, Carlo Camilloni, and Giovanni Bussi. Plumed 2: New  
63 feathers for an old bird. *Computer Physics Communications*, 185(2):604–613, 2014.
- 64 4. A Pérez de Alba Ortíz, A Tiwari, RC Puthenkalathil, and B Ensing. Advances in enhanced sampling along adaptive paths  
65 of collective variables. *The Journal of Chemical Physics*, 149(7):072320, 2018.
- 66 5. Massimiliano Bonomi, Giovanni Bussi, Carlo Camilloni, Gareth A Tribello, Pavel Banáš, Alessandro Barducci, Mattia  
67 Bernetti, Peter G Bolhuis, Sandro Bottaro, Davide Branduardi, et al. Promoting transparency and reproducibility in  
68 enhanced molecular simulations. *Nature methods*, 16(8):670–673, 2019.
